# Supplementary material for: A modelling framework for the prediction of the herd-level probability of infection from longitudinal data
Source: bioRxiv or medRxiv preprint supplement (doi:10.1101/2020.07.10.197426), 2021-09-01

# A modelling framework for the prediction of the herd-level probability of infection from longitudinal data

Supplementary material 2

Madouasse et al.

2021

# Model 1

## Prior distributions

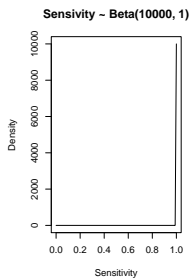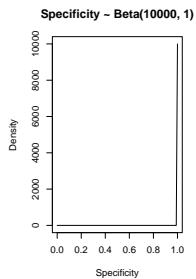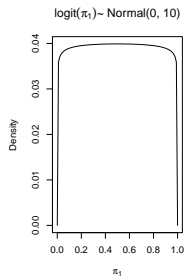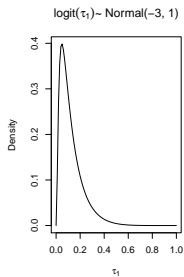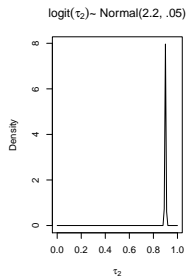

# Model 1

## Traceplot Se - Stan

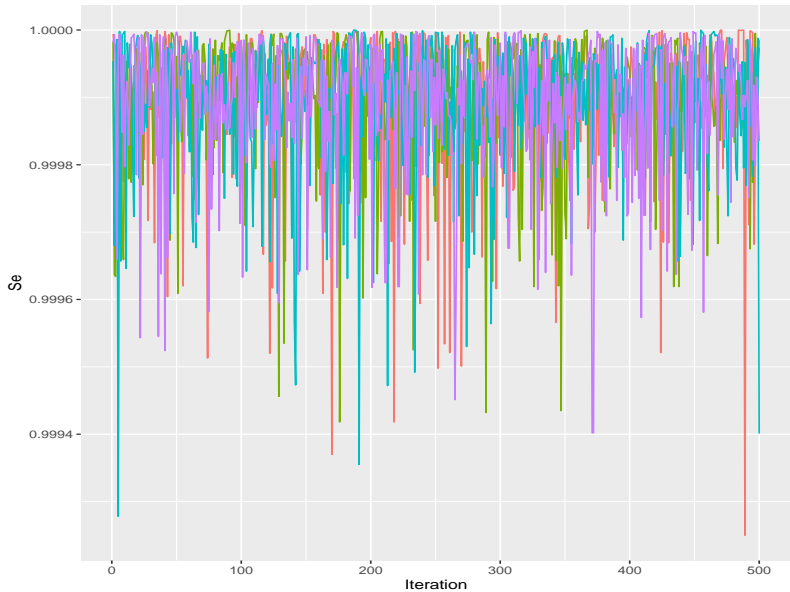

# Model 1

## Traceplot Se - JAGS

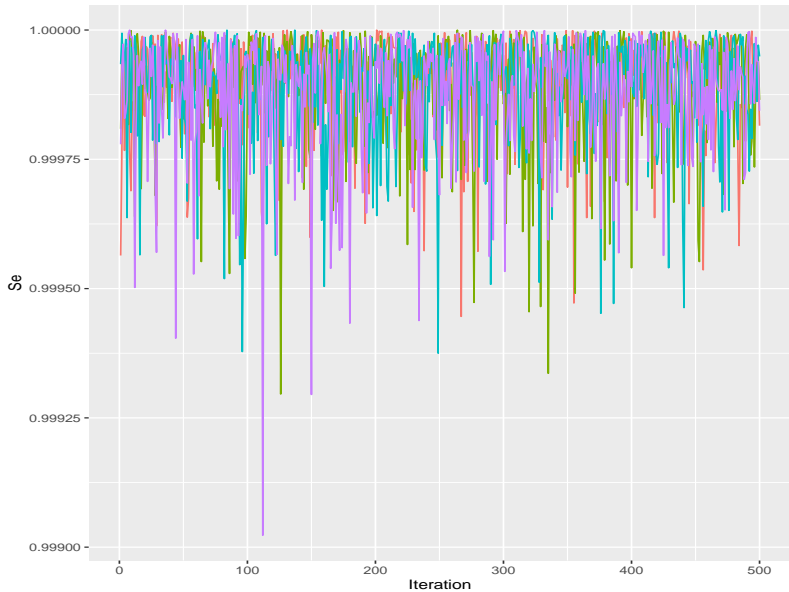

# Model 1

## Traceplot Sp - Stan

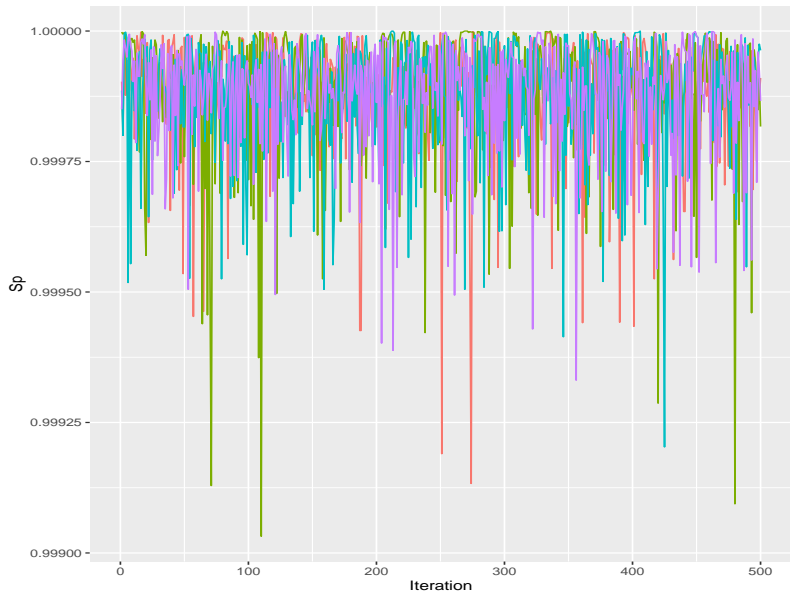

# Model 1

## Traceplot Sp - JAGS

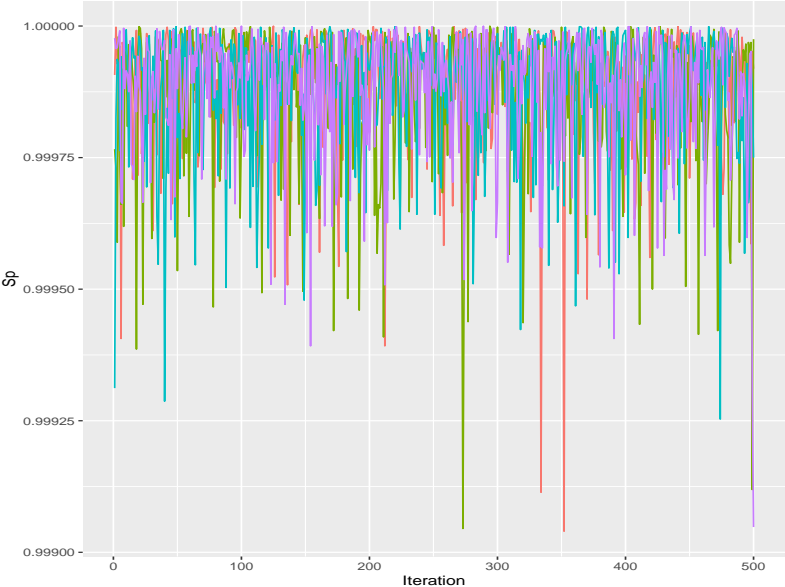

# Model 1

Traceplot  $\tau_1$  - Stan

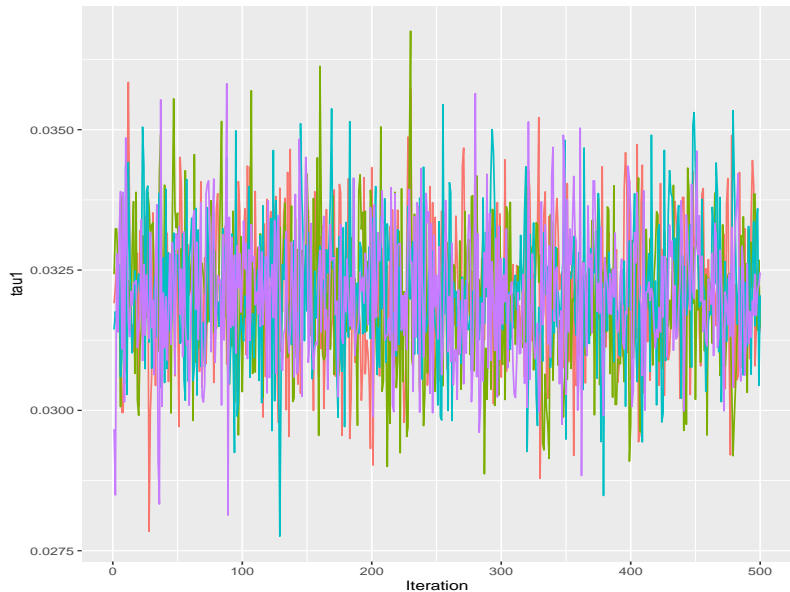

# Model 1

## Traceplot $\tau_1$ - JAGS

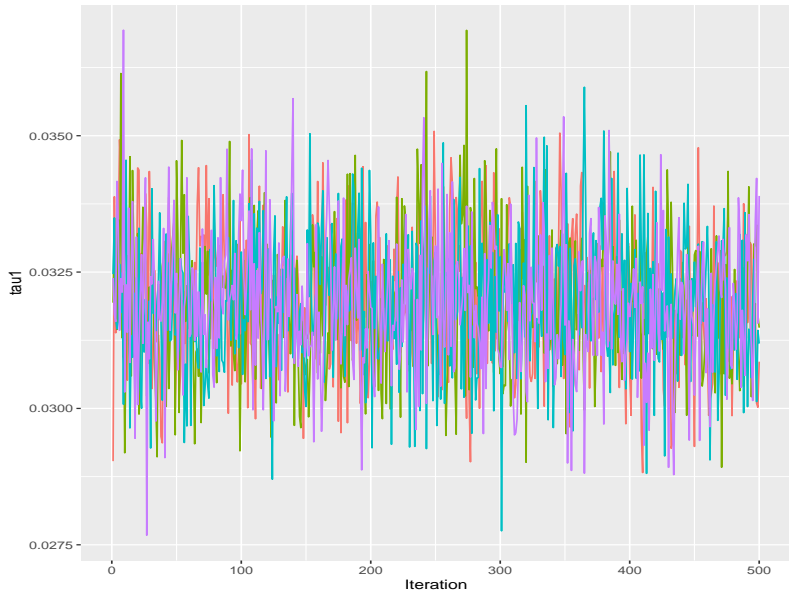



# Model 1

Traceplot  $\tau_2$  - Stan

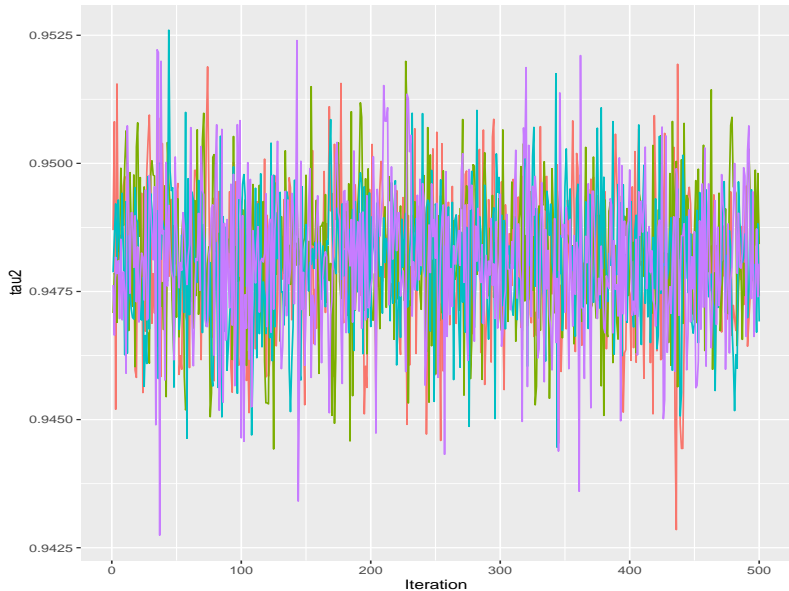

# Model 1

## Traceplot $\tau_2$ - JAGS

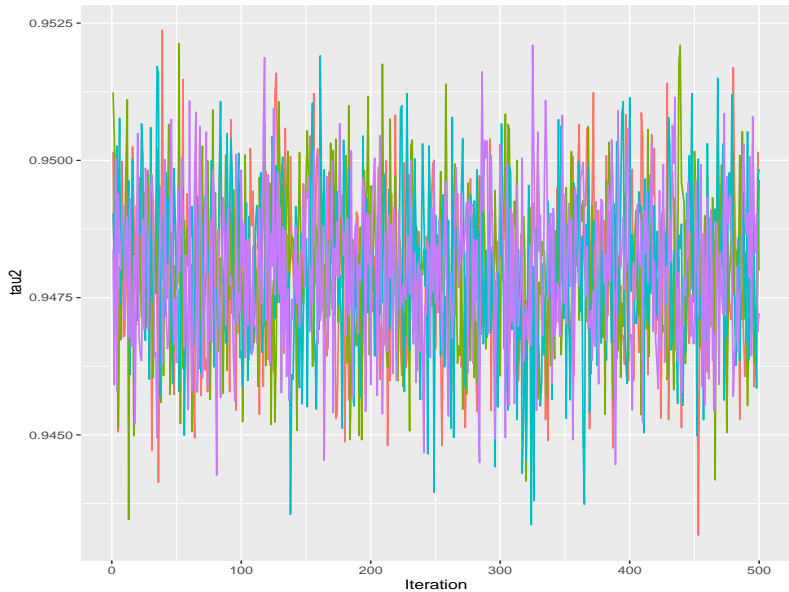

# Model 1

## Results

### Stan

| ## |      | mean       | sd           | median    | 2.5%       | 97.5%      | ess      |
|----|------|------------|--------------|-----------|------------|------------|----------|
| ## | Se   | 0.99989376 | 0.0001053692 | 0.9999270 | 0.99961900 | 0.99999700 | 2601.547 |
| ## | Sp   | 0.99988042 | 0.0001198700 | 0.9999150 | 0.99954897 | 0.99999800 | 2723.426 |
| ## | pi1  | 0.42245757 | 0.0119822438 | 0.4225950 | 0.39994568 | 0.44616445 | 2316.042 |
| ## | tau1 | 0.03207462 | 0.0012292664 | 0.0320741 | 0.02975105 | 0.03441909 | 2307.151 |
| ## | tau2 | 0.94812699 | 0.0013613351 | 0.9481435 | 0.94532152 | 0.95074420 | 2197.862 |

### JAGS

| ## |      | mean       | sd           | median    | 2.5%       | 97.5%      | ess      |
|----|------|------------|--------------|-----------|------------|------------|----------|
| ## | Se   | 0.99988866 | 0.0001091851 | 0.9999230 | 0.99959282 | 0.99999700 | 1852.002 |
| ## | Sp   | 0.99987858 | 0.0001248576 | 0.9999170 | 0.99954698 | 0.99999800 | 1812.019 |
| ## | tau1 | 0.03193929 | 0.0012354725 | 0.0318992 | 0.02956246 | 0.03442477 | 1883.035 |
| ## | tau2 | 0.94797153 | 0.0014219378 | 0.9479885 | 0.94518408 | 0.95078215 | 2000.000 |

# Model 2

## Prior distributions

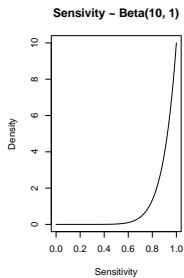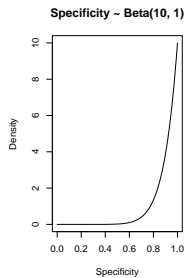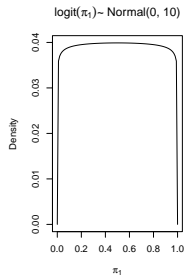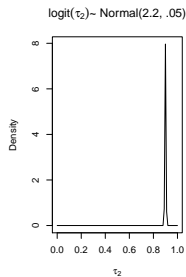

# Model 2

## Traceplot Se - Stan

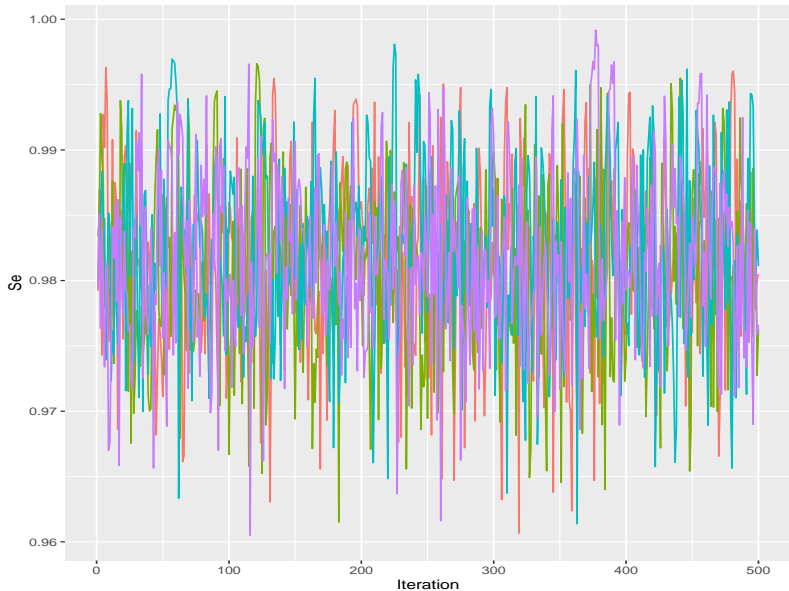

# Model 2

## Traceplot Se - JAGS

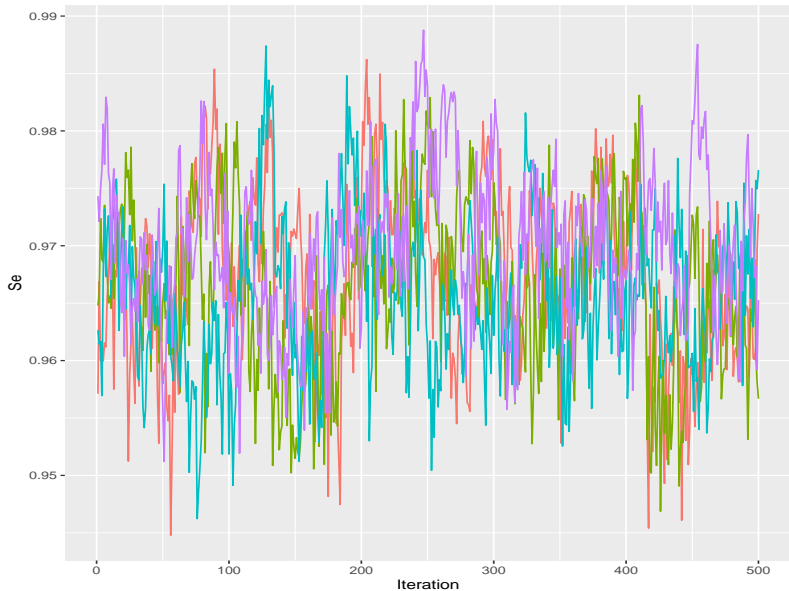

# Model 2

## Traceplot Sp - Stan

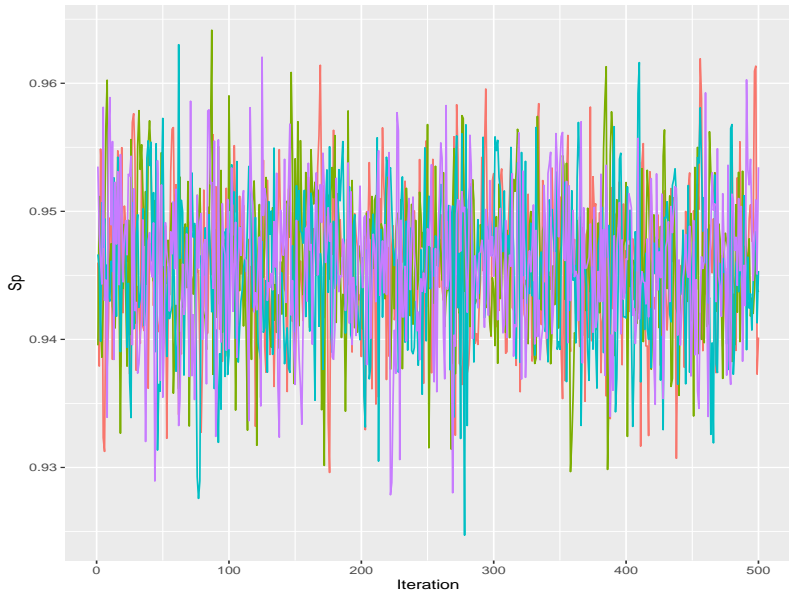

# Model 2

## Traceplot Sp - JAGS

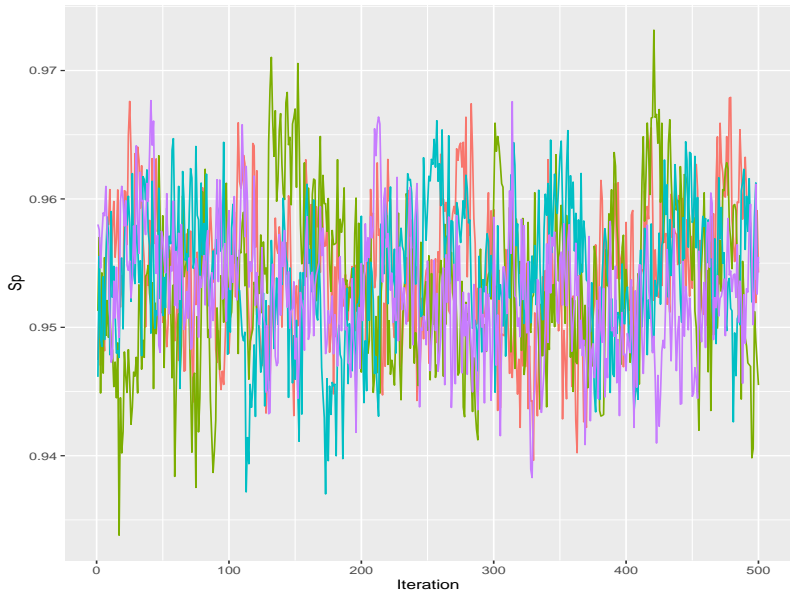



# Model 2

Traceplot  $\tau_1$  - Stan

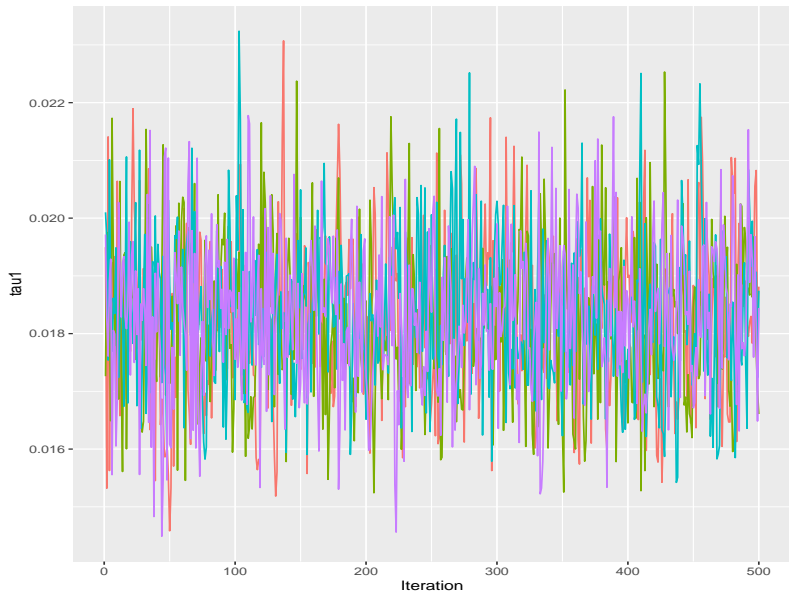

# Model 2

## Traceplot $\tau_1$ - JAGS

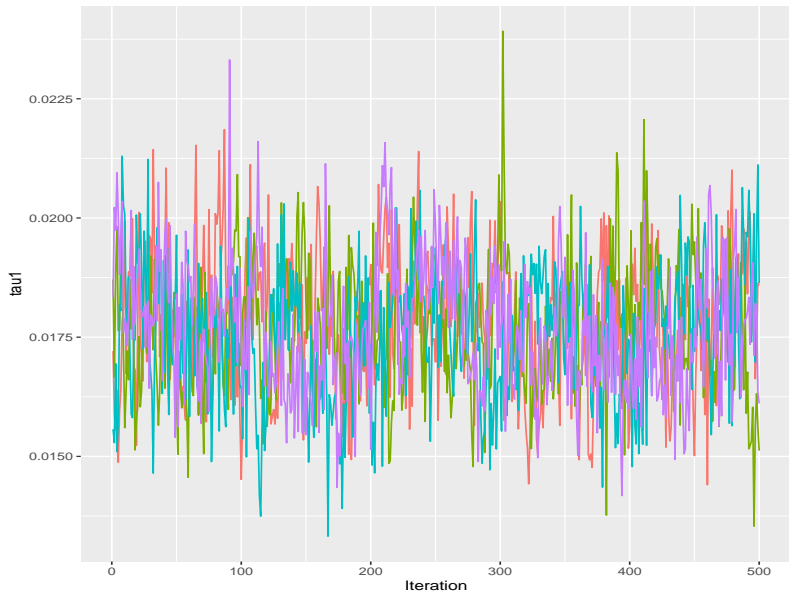

# Model 2

Traceplot  $\tau_2$  - Stan

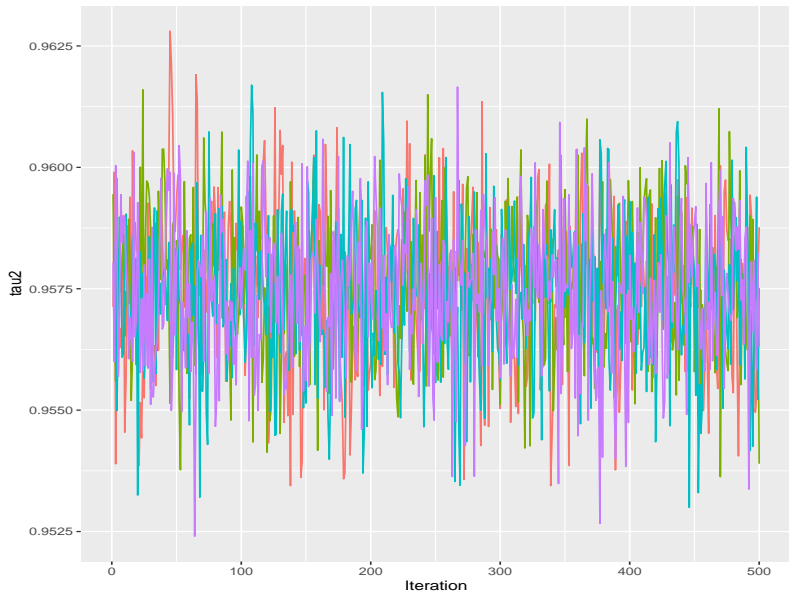

# Model 2

## Traceplot $\tau_2$ - JAGS

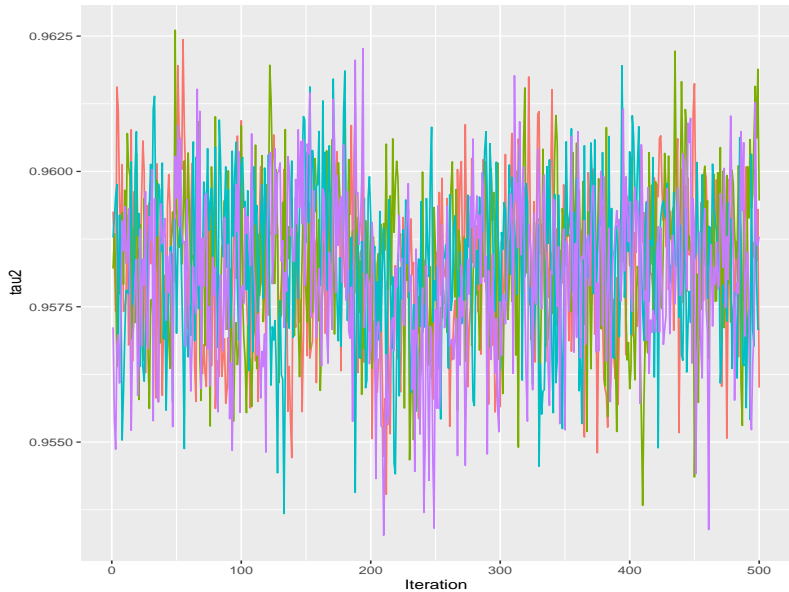

# Model 2

## Results

### Stan

| ## |      | mean       | sd          | median    | 2.5%       | 97.5%      | ess      |
|----|------|------------|-------------|-----------|------------|------------|----------|
| ## | Se   | 0.98153148 | 0.006772653 | 0.9815960 | 0.96764590 | 0.99441652 | 1293.904 |
| ## | Sp   | 0.94578074 | 0.005760651 | 0.9459730 | 0.93387790 | 0.95655520 | 1609.149 |
| ## | pi1  | 0.40960053 | 0.014337346 | 0.4095955 | 0.38182278 | 0.43783165 | 1858.271 |
| ## | tau1 | 0.01828308 | 0.001325285 | 0.0182527 | 0.01582774 | 0.02104124 | 1422.944 |
| ## | tau2 | 0.95748992 | 0.001502596 | 0.9575120 | 0.95447680 | 0.96034437 | 1816.834 |

### JAGS

| ## |      | mean       | sd          | median     | 2.5%       | 97.5%      | ess      |
|----|------|------------|-------------|------------|------------|------------|----------|
| ## | Se   | 0.96735005 | 0.007174289 | 0.96738050 | 0.95292408 | 0.98157328 | 142.2322 |
| ## | Sp   | 0.95364573 | 0.005575297 | 0.95354450 | 0.94312475 | 0.96480888 | 243.2250 |
| ## | tau1 | 0.01770141 | 0.001369073 | 0.01768865 | 0.01509428 | 0.02032662 | 365.3527 |
| ## | tau2 | 0.95820726 | 0.001466730 | 0.95828350 | 0.95528177 | 0.96086675 | 545.3703 |

# Model 3

## Prior distributions

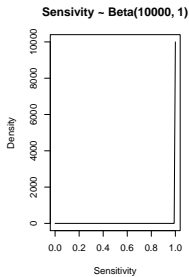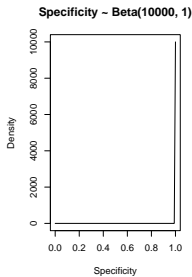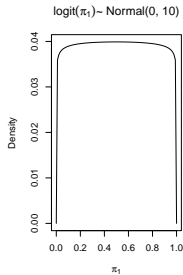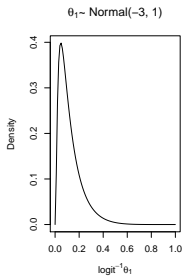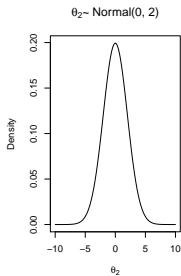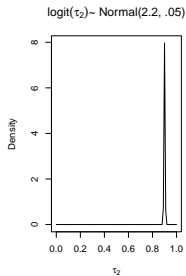

# Model 3

## Traceplot Se - Stan

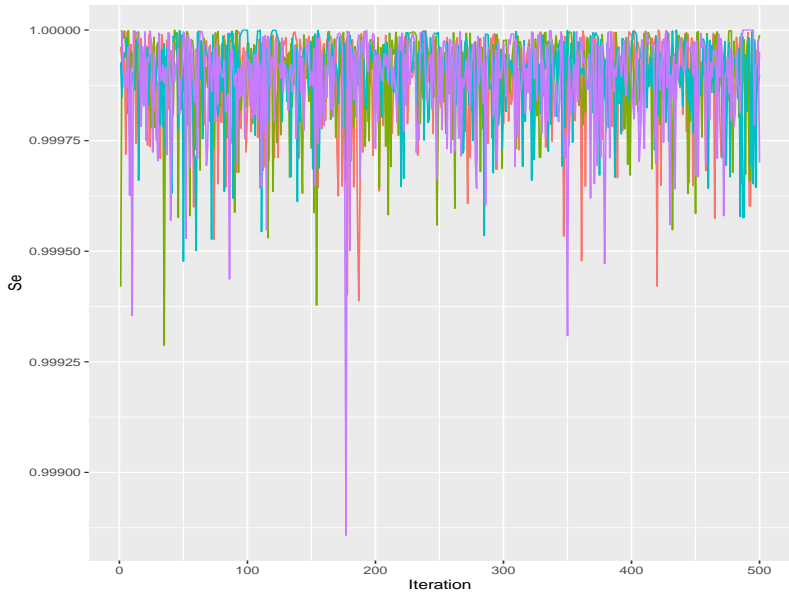

# Model 3

## Traceplot Se - JAGS

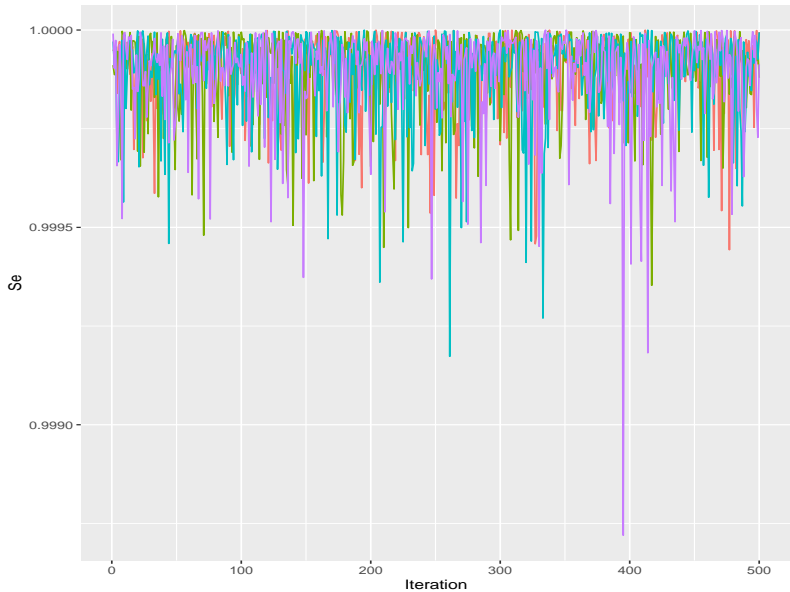



# Model 3

## Traceplot Sp - Stan

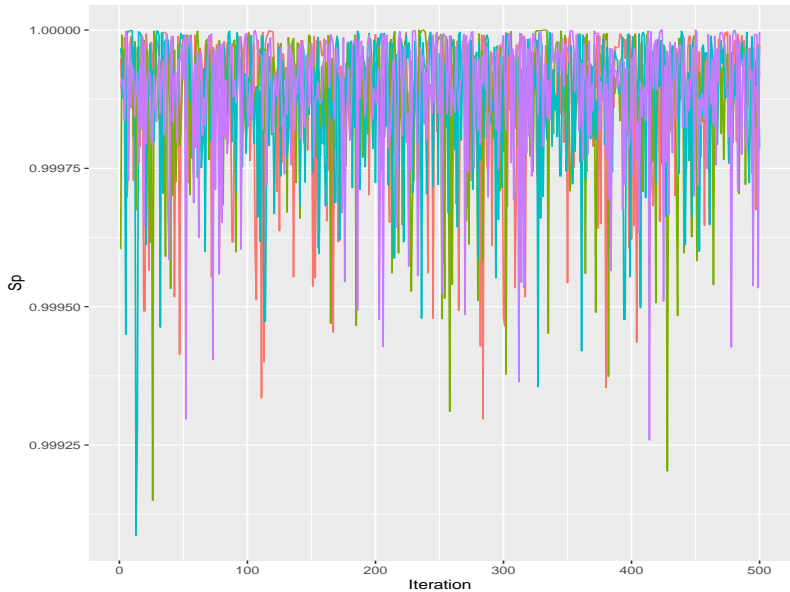

# Model 3

## Traceplot Sp - JAGS

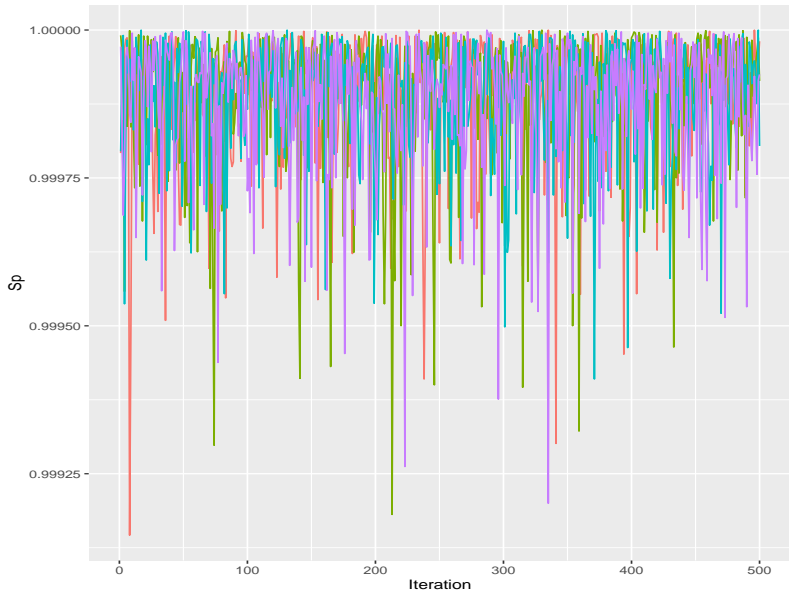

# Model 3

Traceplot  $\theta_1$  - Stan

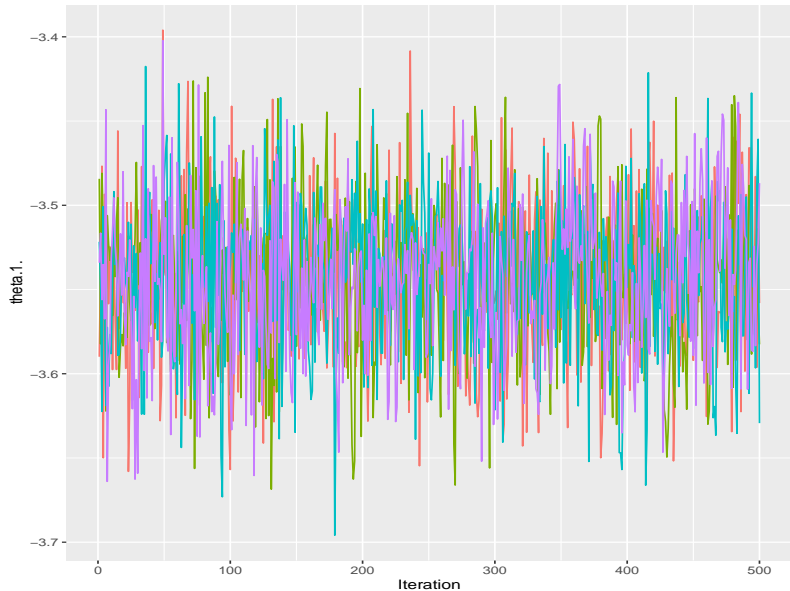

# Model 3

## Traceplot $\theta_1$ - JAGS

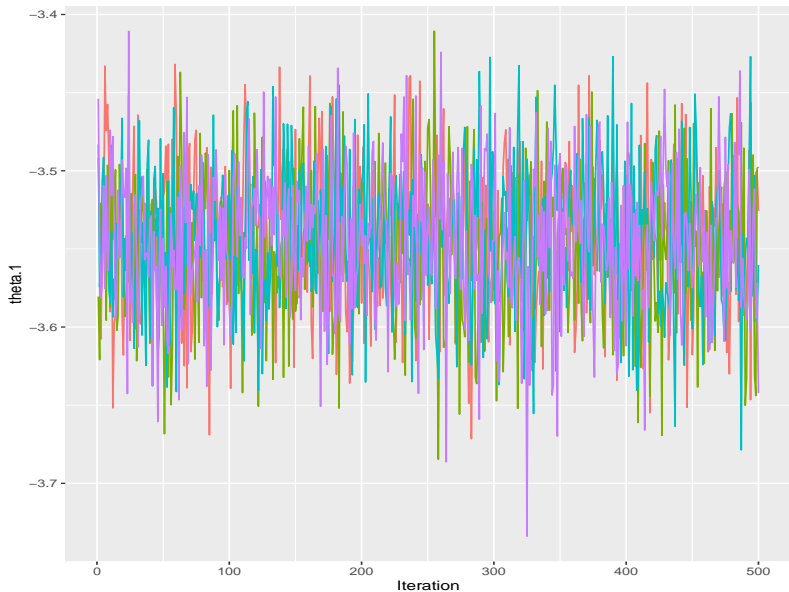

# Model 3

## Traceplot $\theta_2$ - Stan

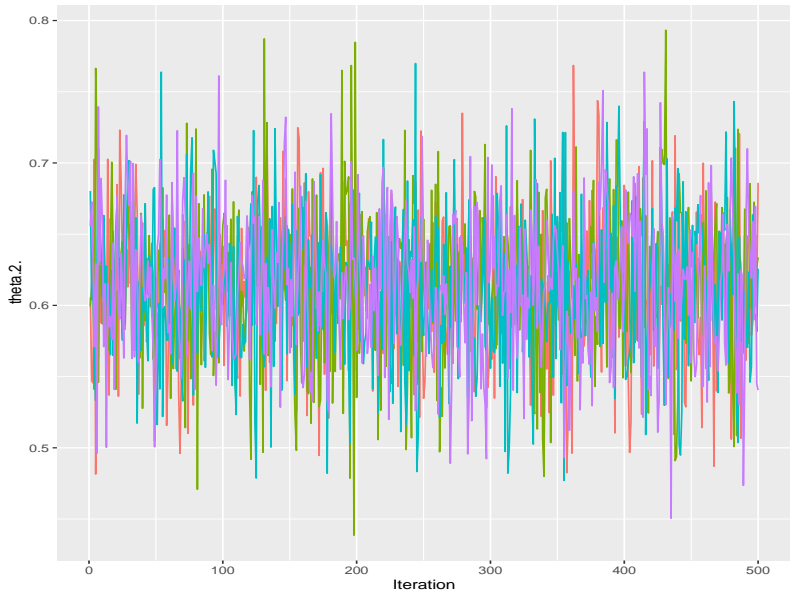

# Model 3

Traceplot  $\theta_2$  - JAGS

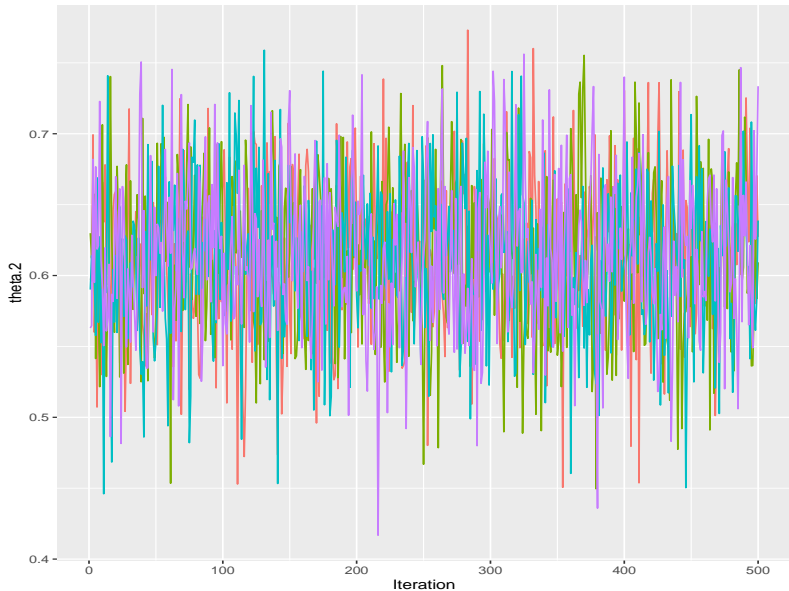

# Model 3

Traceplot  $\tau_2$  - Stan

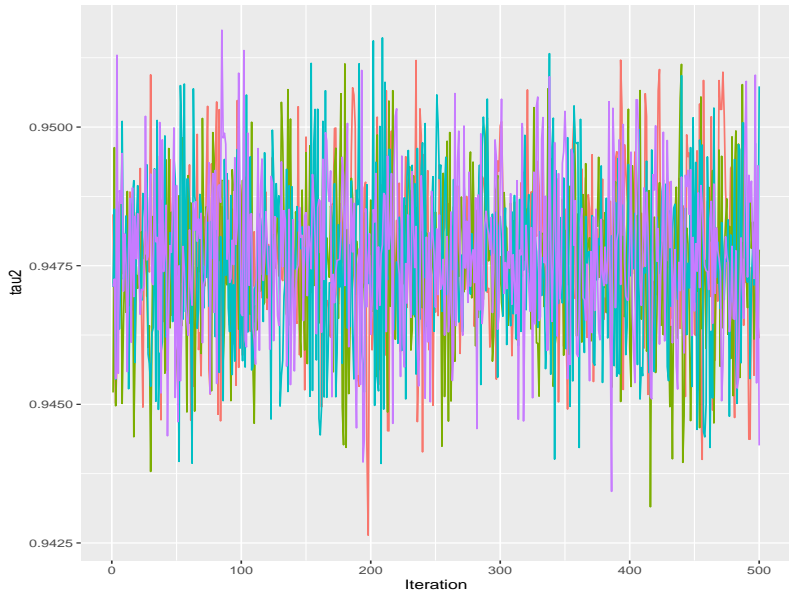

# Model 3

## Traceplot $\tau_2$ - JAGS

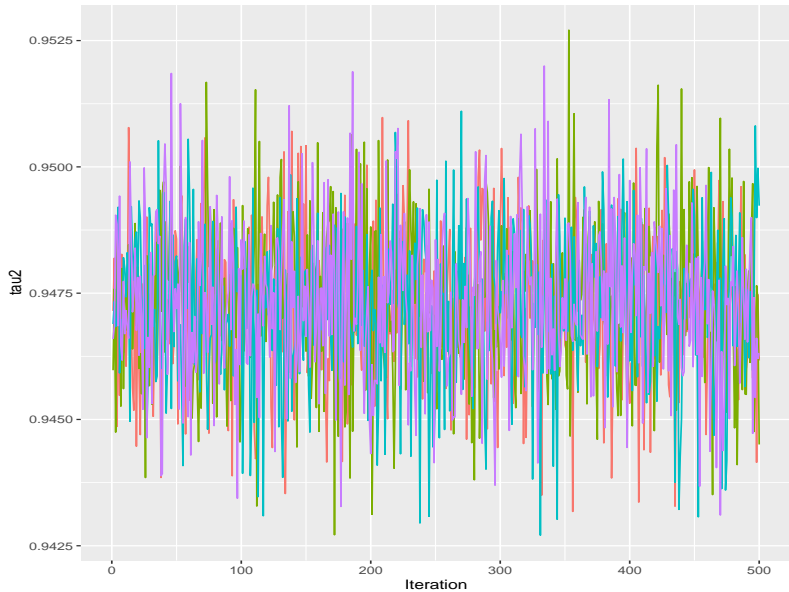



# Model 3

## Results

### Stan

| ## |          | mean       | sd           | median     | 2.5%       | 97.5%      | ess      |
|----|----------|------------|--------------|------------|------------|------------|----------|
| ## | Se       | 0.9998923  | 0.0001068553 | 0.9999260  | 0.9996299  | 0.9999980  | 2541.058 |
| ## | Sp       | 0.9998794  | 0.0001257076 | 0.9999190  | 0.9995129  | 0.9999970  | 2386.008 |
| ## | pi1      | 0.4229835  | 0.0122642609 | 0.4232040  | 0.3980133  | 0.4476861  | 2436.371 |
| ## | tau2     | 0.9476429  | 0.0014357052 | 0.9476455  | 0.9447869  | 0.9504940  | 2387.804 |
| ## | theta.1. | -3.5435235 | 0.0458758567 | -3.5415950 | -3.6335347 | -3.4540673 | 1989.401 |
| ## | theta.2. | 0.6135751  | 0.0515536865 | 0.6153020  | 0.5084849  | 0.7162110  | 2566.518 |

### JAGS

| ## |         | mean       | sd           | median     | 2.5%       | 97.5%      | ess      |
|----|---------|------------|--------------|------------|------------|------------|----------|
| ## | Se      | 0.9998933  | 0.0001127128 | 0.9999290  | 0.9995820  | 0.9999970  | 2000.000 |
| ## | Sp      | 0.9998831  | 0.0001138203 | 0.9999170  | 0.9995760  | 0.9999960  | 1978.305 |
| ## | theta.1 | -3.5452866 | 0.0452831075 | -3.5447350 | -3.6363005 | -3.4575155 | 2026.991 |
| ## | theta.2 | 0.6129062  | 0.0539827551 | 0.6127870  | 0.5079346  | 0.7207263  | 1735.106 |
| ## | tau2    | 0.9472999  | 0.0014943146 | 0.9473445  | 0.9442210  | 0.9502642  | 2114.463 |

# Model 4

## Prior distributions

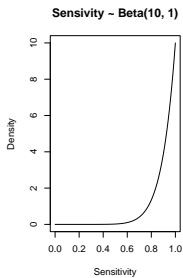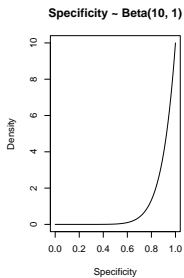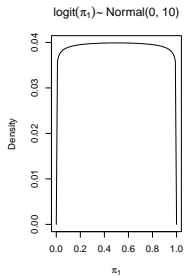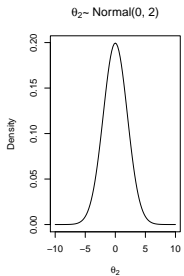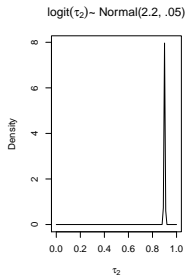

# Model 4

## Traceplot Se - Stan

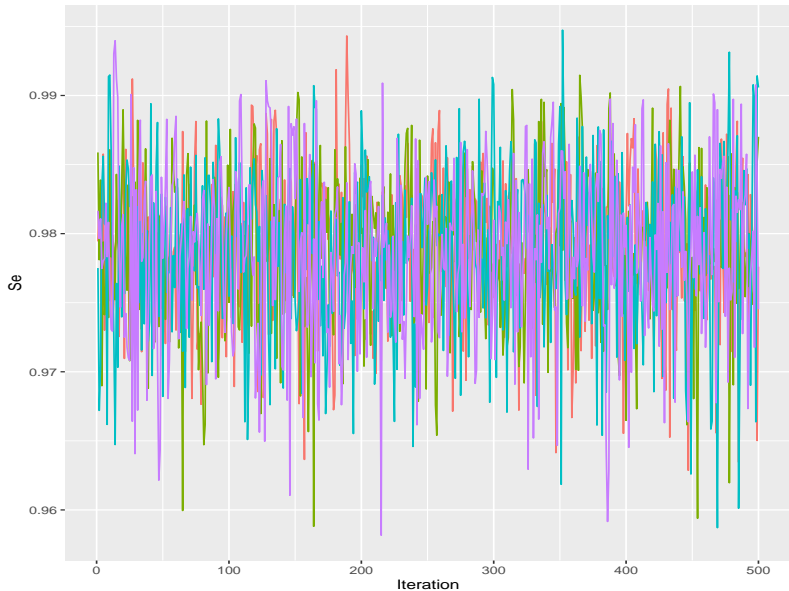

# Model 4

## Traceplot Se - JAGS

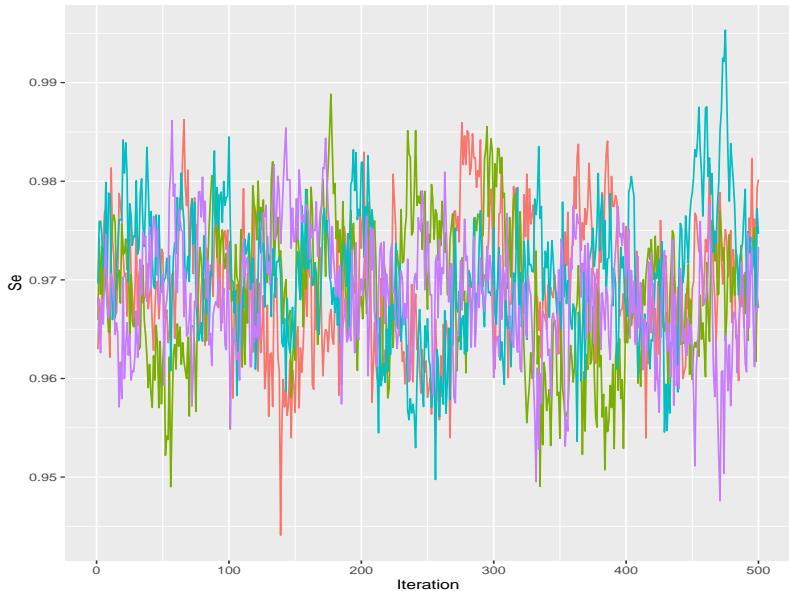

# Model 4

## Traceplot Sp - Stan

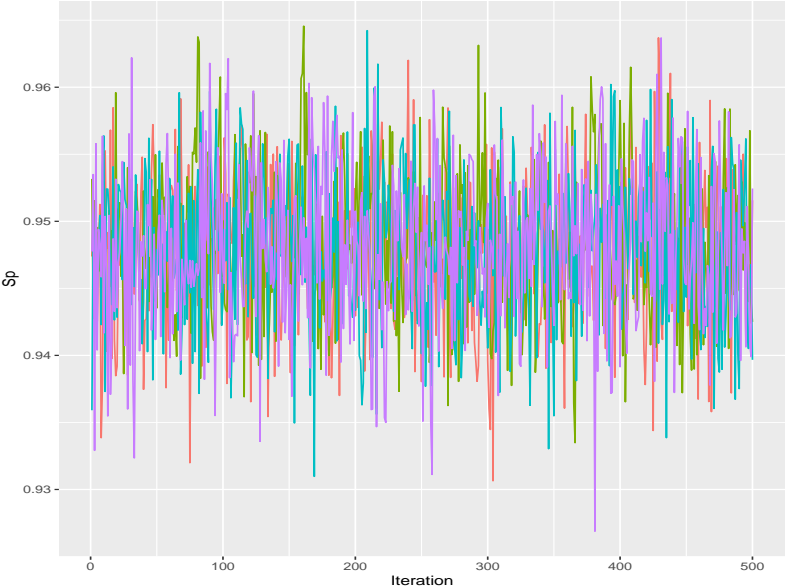

# Model 4

## Traceplot Sp - JAGS

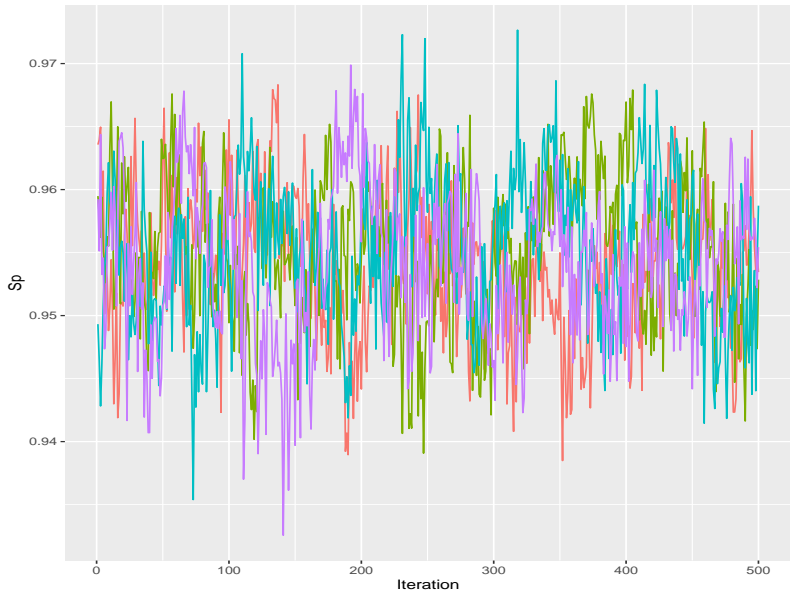

# Model 4

Traceplot  $\theta_1$  - Stan

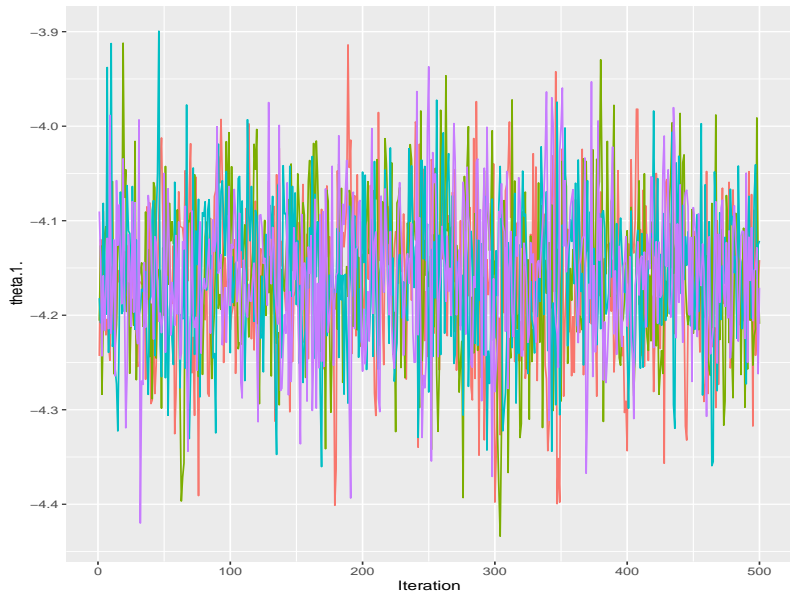

# Model 4

Traceplot  $\theta_1$  - JAGS

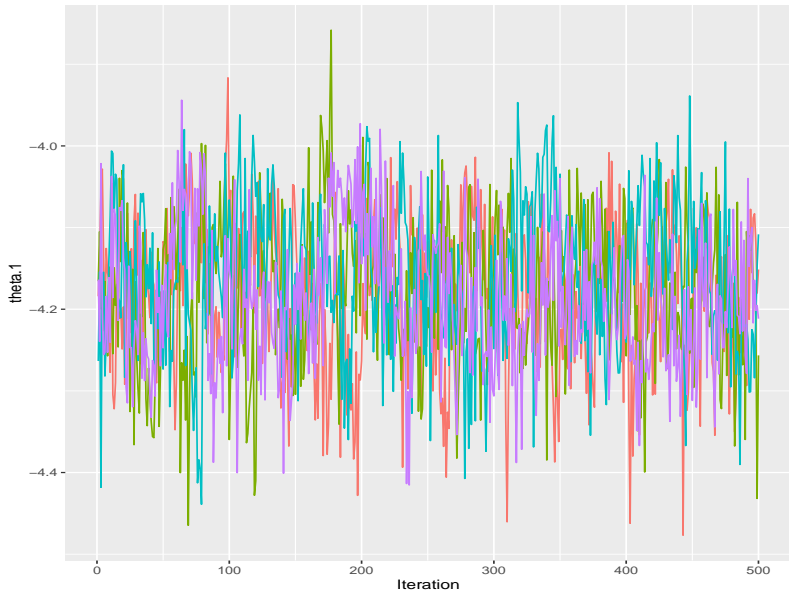



# Model 4

Traceplot  $\theta_2$  - Stan

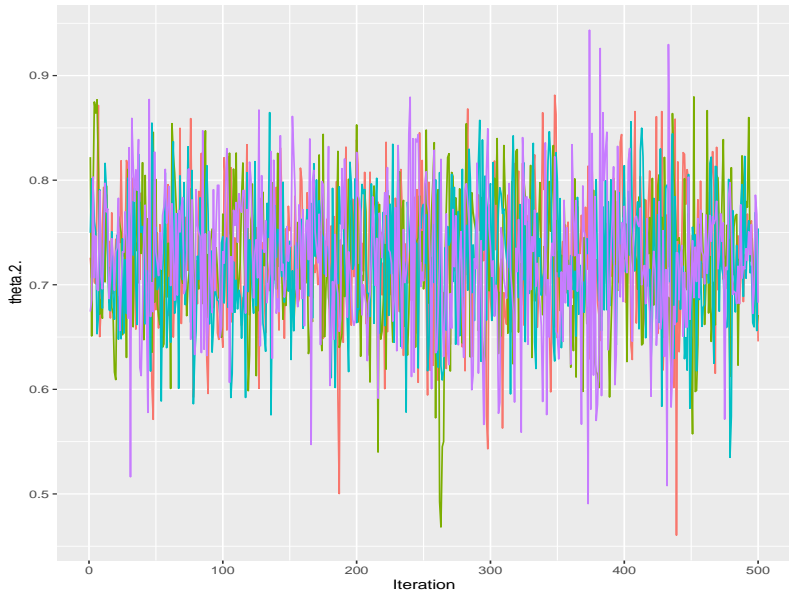

# Model 4

## Traceplot $\theta_2$ - JAGS

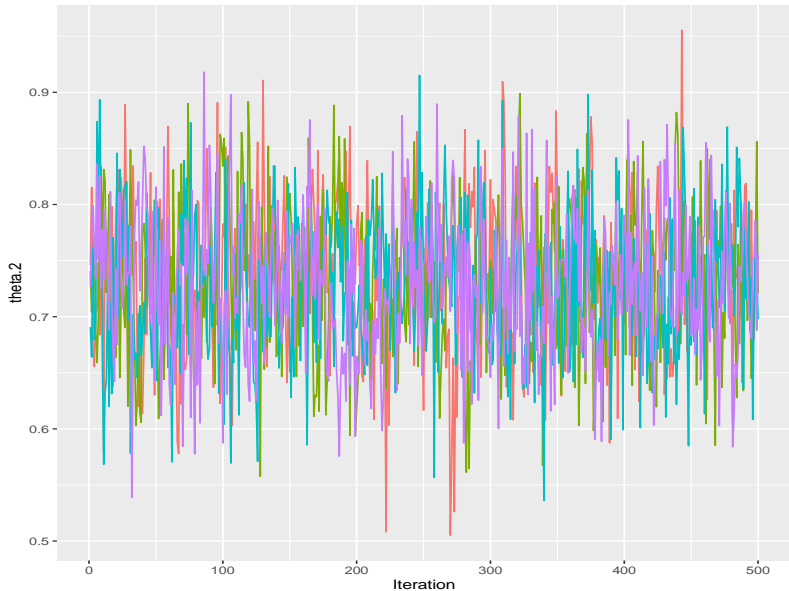

# Model 4

Traceplot  $\tau_2$  - Stan

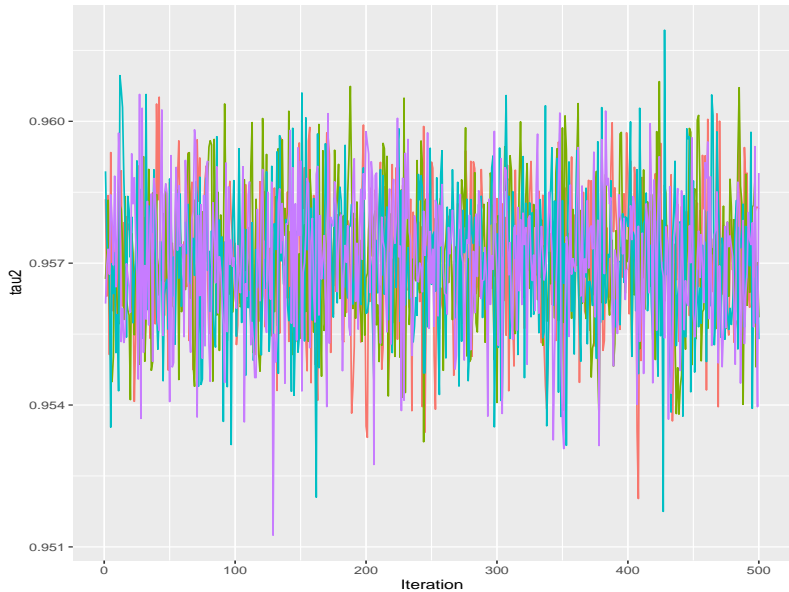

# Model 4

## Traceplot $\tau_2$ - JAGS

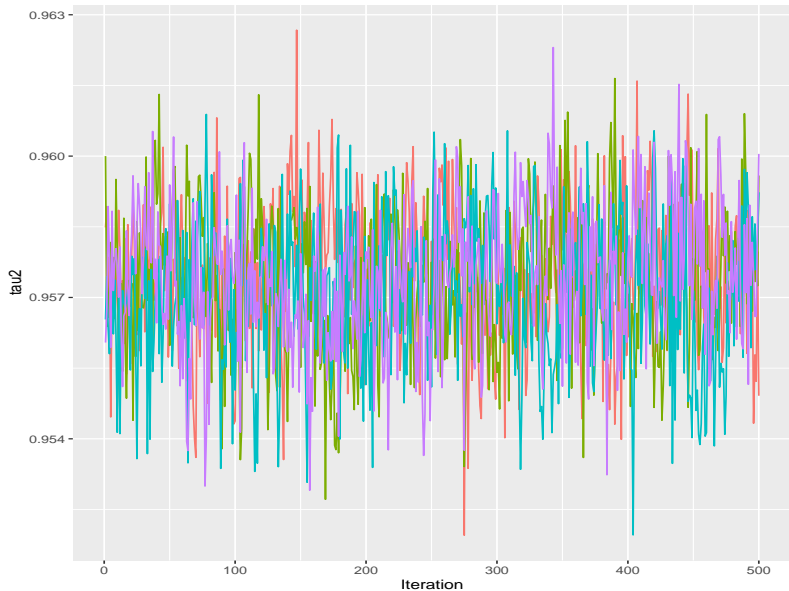

# Model 4

## Results

### Stan

| ##          | mean       | sd          | median     | 2.5%       | 97.5%      | ess      |
|-------------|------------|-------------|------------|------------|------------|----------|
| ## Se       | 0.9787592  | 0.005700809 | 0.9790445  | 0.9664178  | 0.9892195  | 2087.078 |
| ## Sp       | 0.9480368  | 0.005590873 | 0.9479030  | 0.9371573  | 0.9590133  | 2007.011 |
| ## pi1      | 0.4107576  | 0.013008345 | 0.4108420  | 0.3843662  | 0.4364940  | 2173.017 |
| ## tau2     | 0.9570797  | 0.001471666 | 0.9571275  | 0.9540979  | 0.9598452  | 3039.028 |
| ## theta.1. | -4.1586092 | 0.078906029 | -4.1559800 | -4.3198643 | -4.0032375 | 1432.438 |
| ## theta.2. | 0.7244467  | 0.062941083 | 0.7246880  | 0.5958777  | 0.8424609  | 1802.306 |

### JAGS

| ##         | mean       | sd          | median     | 2.5%       | 97.5%      | ess       |
|------------|------------|-------------|------------|------------|------------|-----------|
| ## Se      | 0.9693652  | 0.006778411 | 0.9693805  | 0.9563966  | 0.9824612  | 145.0035  |
| ## Sp      | 0.9546281  | 0.005765281 | 0.9547860  | 0.9430777  | 0.9651936  | 174.6555  |
| ## theta.1 | -4.1771472 | 0.088496446 | -4.1773050 | -4.3575447 | -4.0141232 | 404.9377  |
| ## theta.2 | 0.7309639  | 0.064165430 | 0.7313855  | 0.6064481  | 0.8555339  | 1057.3814 |
| ## tau2    | 0.9573082  | 0.001506189 | 0.9573440  | 0.9541348  | 0.9601620  | 566.9616  |

# Predicted probabilities of status positive

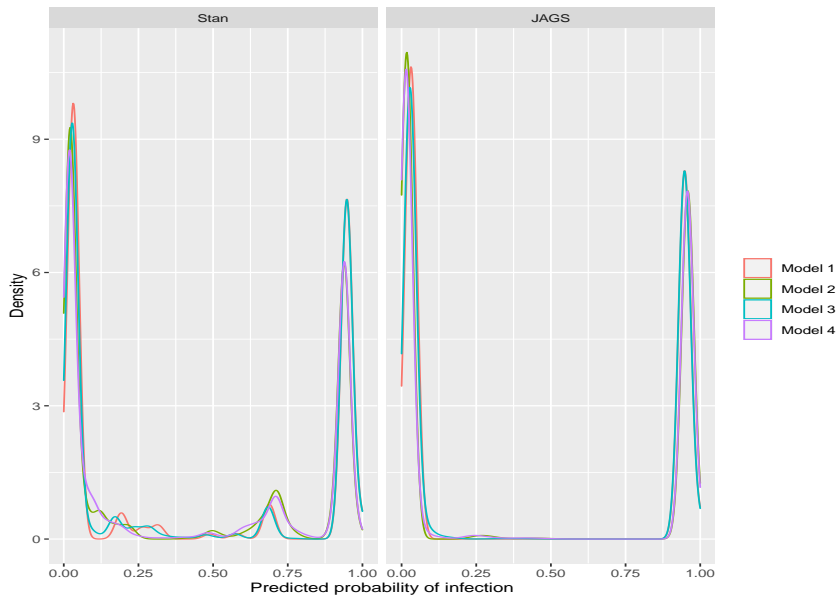

Supplement: Supplementary file [file media-2.pdf]
